# Supplementary material for: Mindful Kangaroo Care: mindfulness intervention for mothers during skin-to-skin care: a randomized control pilot study
Source: PubMed Central journal article supplement (PMC8761274; doi:10.1186/s12884-021-04336-w), 2022-01-15
Supplement: 12884_2021_4336_MOESM6_ESM.pdf [file 12884_2021_4336_MOESM6_ESM.pdf]

Mindful Kangaroo Care: Mindfulness Intervention for mothers during skin-to-skin care: a randomized control pilot study.

Additional file #6: Kangaroo Care Log Intervention Group

Week 1:

Please write date and circle D for day time (7am-4pm), E for evening (after 4pm)

Please write approximately how long in minutes lasted the kangaroo care

Circle approximately how much time you spent 1- practicing mindfulness, 2- using your smartphone, 3- sleeping and 4-engaged in a conversation with people around you during kangaroo care (0% - 25% - 50% - 75% or 100%)

Last question (How satisfied ...): Circle 1= Very dissatisfied, 2= Slightly dissatisfied, 3= Neutral, 4= Slightly Satisfied, 5= Very satisfied

| Date & Time<br>(Month/Day)<br>Day/Evening | Kangaroo<br>Care Duration<br>in minutes<br>(approx) | Mindfulness<br>exercise for<br>how much time?<br>From 0-100% | Smartphone<br>for<br>how much time?<br>From 0-100% | Sleeping<br>for<br>how much time?<br>From 0-100% | Conversation<br>for<br>how much time?<br>From 0-100% | How satisfied<br>were you after<br>this Kangaroo<br>care? |
|-------------------------------------------|-----------------------------------------------------|--------------------------------------------------------------|----------------------------------------------------|--------------------------------------------------|------------------------------------------------------|-----------------------------------------------------------|
| ___/___ D/E                               | minutes                                             | 0/ 25/ 50/ 75/ 100                                           | 0/ 25/ 50/ 75/ 100                                 | 0/ 25/ 50/ 75/ 100                               | 0/ 25/ 50/ 75/ 100                                   | 1 / 2 / 3 / 4 / 5                                         |
| ___/___ D/E                               | minutes                                             | 0/ 25/ 50/ 75/ 100                                           | 0/ 25/ 50/ 75/ 100                                 | 0/ 25/ 50/ 75/ 100                               | 0/ 25/ 50/ 75/ 100                                   | 1 / 2 / 3 / 4 / 5                                         |
| ___/___ D/E                               | minutes                                             | 0/ 25/ 50/ 75/ 100                                           | 0/ 25/ 50/ 75/ 100                                 | 0/ 25/ 50/ 75/ 100                               | 0/ 25/ 50/ 75/ 100                                   | 1 / 2 / 3 / 4 / 5                                         |
| ___/___ D/E                               | minutes                                             | 0/ 25/ 50/ 75/ 100                                           | 0/ 25/ 50/ 75/ 100                                 | 0/ 25/ 50/ 75/ 100                               | 0/ 25/ 50/ 75/ 100                                   | 1 / 2 / 3 / 4 / 5                                         |
| ___/___ D/E                               | minutes                                             | 0/ 25/ 50/ 75/ 100                                           | 0/ 25/ 50/ 75/ 100                                 | 0/ 25/ 50/ 75/ 100                               | 0/ 25/ 50/ 75/ 100                                   | 1 / 2 / 3 / 4 / 5                                         |
| ___/___ D/E                               | minutes                                             | 0/ 25/ 50/ 75/ 100                                           | 0/ 25/ 50/ 75/ 100                                 | 0/ 25/ 50/ 75/ 100                               | 0/ 25/ 50/ 75/ 100                                   | 1 / 2 / 3 / 4 / 5                                         |
| ___/___ D/E                               | minutes                                             | 0/ 25/ 50/ 75/ 100                                           | 0/ 25/ 50/ 75/ 100                                 | 0/ 25/ 50/ 75/ 100                               | 0/ 25/ 50/ 75/ 100                                   | 1 / 2 / 3 / 4 / 5                                         |
| ___/___ D/E                               | minutes                                             | 0/ 25/ 50/ 75/ 100                                           | 0/ 25/ 50/ 75/ 100                                 | 0/ 25/ 50/ 75/ 100                               | 0/ 25/ 50/ 75/ 100                                   | 1 / 2 / 3 / 4 / 5                                         |

Have you listened to the mindfulness instruction audio recording this week?

Yes / No

Have you listened to the mindfulness guided practice audio recording this week?

Yes / No

**Have you practiced any other mindfulness while not offering skin-to-skin care?**

**Yes / No** (if yes please detail below)

Any comments to help this study or about your mindfulness experience:

---



---



---

Mindful Kangaroo Care: Mindfulness Intervention for mothers during skin-to-skin care: a randomized control pilot study.

Additional file #6: Kangaroo Care Log Intervention Group

Week 2:

Please write date and circle D for day time (7am-4pm), E for evening (after 4pm)

Please write approximately how long in minutes lasted the kangaroo care

Circle approximately how much time you spent 1- practicing mindfulness, 2- using your smartphone, 3- sleeping and 4-engaged in a conversation with people around you during kangaroo care (0% - 25% - 50% - 75% or 100%)

Last question (How satisfied ...): Circle 1= Very dissatisfied, 2= Slightly dissatisfied, 3= Neutral, 4= Slightly Satisfied, 5= Very satisfied

| Date & Time (Month/Day) Day/Evening | Kangaroo Care Duration in minutes (approx) | Mindfulness exercise for how much time? From 0-100% | Smartphone for how much time? From 0-100% | Sleeping for how much time? From 0-100% | Conversation for how much time? From 0-100% | How satisfied were you after this Kangaroo care? |
|-------------------------------------|--------------------------------------------|-----------------------------------------------------|-------------------------------------------|-----------------------------------------|---------------------------------------------|--------------------------------------------------|
| ___/___ D/E                         | minutes                                    | 0/ 25/ 50/ 75/ 100                                  | 0/ 25/ 50/ 75/ 100                        | 0/ 25/ 50/ 75/ 100                      | 0/ 25/ 50/ 75/ 100                          | 1 / 2 / 3 / 4 / 5                                |
| ___/___ D/E                         | minutes                                    | 0/ 25/ 50/ 75/ 100                                  | 0/ 25/ 50/ 75/ 100                        | 0/ 25/ 50/ 75/ 100                      | 0/ 25/ 50/ 75/ 100                          | 1 / 2 / 3 / 4 / 5                                |
| ___/___ D/E                         | minutes                                    | 0/ 25/ 50/ 75/ 100                                  | 0/ 25/ 50/ 75/ 100                        | 0/ 25/ 50/ 75/ 100                      | 0/ 25/ 50/ 75/ 100                          | 1 / 2 / 3 / 4 / 5                                |
| ___/___ D/E                         | minutes                                    | 0/ 25/ 50/ 75/ 100                                  | 0/ 25/ 50/ 75/ 100                        | 0/ 25/ 50/ 75/ 100                      | 0/ 25/ 50/ 75/ 100                          | 1 / 2 / 3 / 4 / 5                                |
| ___/___ D/E                         | minutes                                    | 0/ 25/ 50/ 75/ 100                                  | 0/ 25/ 50/ 75/ 100                        | 0/ 25/ 50/ 75/ 100                      | 0/ 25/ 50/ 75/ 100                          | 1 / 2 / 3 / 4 / 5                                |
| ___/___ D/E                         | minutes                                    | 0/ 25/ 50/ 75/ 100                                  | 0/ 25/ 50/ 75/ 100                        | 0/ 25/ 50/ 75/ 100                      | 0/ 25/ 50/ 75/ 100                          | 1 / 2 / 3 / 4 / 5                                |
| ___/___ D/E                         | minutes                                    | 0/ 25/ 50/ 75/ 100                                  | 0/ 25/ 50/ 75/ 100                        | 0/ 25/ 50/ 75/ 100                      | 0/ 25/ 50/ 75/ 100                          | 1 / 2 / 3 / 4 / 5                                |
| ___/___ D/E                         | minutes                                    | 0/ 25/ 50/ 75/ 100                                  | 0/ 25/ 50/ 75/ 100                        | 0/ 25/ 50/ 75/ 100                      | 0/ 25/ 50/ 75/ 100                          | 1 / 2 / 3 / 4 / 5                                |

Have you listened to the mindfulness instruction audio recording this week?

Yes / No

Have you listened to the mindfulness guided practice audio recording this week?

Yes / No

**Have you practiced any other mindfulness while not offering skin-to-skin care?**

**Yes / No** (if yes please detail below)

Any comments to help this study or about your mindfulness experience:

---



---



---

Mindful Kangaroo Care: Mindfulness Intervention for mothers during skin-to-skin care: a randomized control pilot study.

Additional file #6: Kangaroo Care Log Intervention Group

Week 3:

Please write date and circle D for day time (7am-4pm), E for evening (after 4pm)

Please write approximately how long in minutes lasted the kangaroo care

Circle approximately how much time you spent 1- practicing mindfulness, 2- using your smartphone, 3- sleeping and 4-engaged in a conversation with people around you during kangaroo care (0% - 25% - 50% - 75% or 100%)

Last question (How satisfied ...): Circle 1= Very dissatisfied, 2= Slightly dissatisfied, 3= Neutral, 4= Slightly Satisfied, 5= Very satisfied

| Date & Time<br>(Month/Day)<br>Day/Evening | Kangaroo<br>Care Duration<br>in minutes<br>(approx) | Mindfulness<br>exercise for<br>how much time?<br>From 0-100% | Smartphone<br>for<br>how much time?<br>From 0-100% | Sleeping<br>for<br>how much time?<br>From 0-100% | Conversation<br>for<br>how much time?<br>From 0-100% | How satisfied<br>were you after<br>this Kangaroo<br>care? |
|-------------------------------------------|-----------------------------------------------------|--------------------------------------------------------------|----------------------------------------------------|--------------------------------------------------|------------------------------------------------------|-----------------------------------------------------------|
| ___/___ D/E                               | minutes                                             | 0/ 25/ 50/ 75/ 100                                           | 0/ 25/ 50/ 75/ 100                                 | 0/ 25/ 50/ 75/ 100                               | 0/ 25/ 50/ 75/ 100                                   | 1 / 2 / 3 / 4 / 5                                         |
| ___/___ D/E                               | minutes                                             | 0/ 25/ 50/ 75/ 100                                           | 0/ 25/ 50/ 75/ 100                                 | 0/ 25/ 50/ 75/ 100                               | 0/ 25/ 50/ 75/ 100                                   | 1 / 2 / 3 / 4 / 5                                         |
| ___/___ D/E                               | minutes                                             | 0/ 25/ 50/ 75/ 100                                           | 0/ 25/ 50/ 75/ 100                                 | 0/ 25/ 50/ 75/ 100                               | 0/ 25/ 50/ 75/ 100                                   | 1 / 2 / 3 / 4 / 5                                         |
| ___/___ D/E                               | minutes                                             | 0/ 25/ 50/ 75/ 100                                           | 0/ 25/ 50/ 75/ 100                                 | 0/ 25/ 50/ 75/ 100                               | 0/ 25/ 50/ 75/ 100                                   | 1 / 2 / 3 / 4 / 5                                         |
| ___/___ D/E                               | minutes                                             | 0/ 25/ 50/ 75/ 100                                           | 0/ 25/ 50/ 75/ 100                                 | 0/ 25/ 50/ 75/ 100                               | 0/ 25/ 50/ 75/ 100                                   | 1 / 2 / 3 / 4 / 5                                         |
| ___/___ D/E                               | minutes                                             | 0/ 25/ 50/ 75/ 100                                           | 0/ 25/ 50/ 75/ 100                                 | 0/ 25/ 50/ 75/ 100                               | 0/ 25/ 50/ 75/ 100                                   | 1 / 2 / 3 / 4 / 5                                         |
| ___/___ D/E                               | minutes                                             | 0/ 25/ 50/ 75/ 100                                           | 0/ 25/ 50/ 75/ 100                                 | 0/ 25/ 50/ 75/ 100                               | 0/ 25/ 50/ 75/ 100                                   | 1 / 2 / 3 / 4 / 5                                         |
| ___/___ D/E                               | minutes                                             | 0/ 25/ 50/ 75/ 100                                           | 0/ 25/ 50/ 75/ 100                                 | 0/ 25/ 50/ 75/ 100                               | 0/ 25/ 50/ 75/ 100                                   | 1 / 2 / 3 / 4 / 5                                         |

Have you listened to the mindfulness instruction audio recording this week?

Yes / No

Have you listened to the mindfulness guided practice audio recording this week?

Yes / No

**Have you practiced any other mindfulness while not offering skin-to-skin care?**

**Yes / No** (if yes please detail below)

Any comments to help this study or about your mindfulness experience:

---



---



---

Mindful Kangaroo Care: Mindfulness Intervention for mothers during skin-to-skin care: a randomized control pilot study.

Additional file #6: Kangaroo Care Log Intervention Group

Week 4:

Please write date and circle D for day time (7am-4pm), E for evening (after 4pm)

Please write approximately how long in minutes lasted the kangaroo care

Circle approximately how much time you spent 1- practicing mindfulness, 2- using your smartphone, 3- sleeping and 4-engaged in a conversation with people around you during kangaroo care (0% - 25% - 50% - 75% or 100%)

Last question (How satisfied ...): Circle 1= Very dissatisfied, 2= Slightly dissatisfied, 3= Neutral, 4= Slightly Satisfied, 5= Very satisfied

| Date & Time<br>(Month/Day)<br>Day/Evening | Kangaroo<br>Care Duration<br>in minutes<br>(approx) | Mindfulness<br>exercise for<br>how much time?<br>From 0-100% | Smartphone<br>for<br>how much time?<br>From 0-100% | Sleeping<br>for<br>how much time?<br>From 0-100% | Conversation<br>for<br>how much time?<br>From 0-100% | How satisfied<br>were you after<br>this Kangaroo<br>care? |
|-------------------------------------------|-----------------------------------------------------|--------------------------------------------------------------|----------------------------------------------------|--------------------------------------------------|------------------------------------------------------|-----------------------------------------------------------|
| ___/___ D/E                               | minutes                                             | 0/ 25/ 50/ 75/ 100                                           | 0/ 25/ 50/ 75/ 100                                 | 0/ 25/ 50/ 75/ 100                               | 0/ 25/ 50/ 75/ 100                                   | 1 / 2 / 3 / 4 / 5                                         |
| ___/___ D/E                               | minutes                                             | 0/ 25/ 50/ 75/ 100                                           | 0/ 25/ 50/ 75/ 100                                 | 0/ 25/ 50/ 75/ 100                               | 0/ 25/ 50/ 75/ 100                                   | 1 / 2 / 3 / 4 / 5                                         |
| ___/___ D/E                               | minutes                                             | 0/ 25/ 50/ 75/ 100                                           | 0/ 25/ 50/ 75/ 100                                 | 0/ 25/ 50/ 75/ 100                               | 0/ 25/ 50/ 75/ 100                                   | 1 / 2 / 3 / 4 / 5                                         |
| ___/___ D/E                               | minutes                                             | 0/ 25/ 50/ 75/ 100                                           | 0/ 25/ 50/ 75/ 100                                 | 0/ 25/ 50/ 75/ 100                               | 0/ 25/ 50/ 75/ 100                                   | 1 / 2 / 3 / 4 / 5                                         |
| ___/___ D/E                               | minutes                                             | 0/ 25/ 50/ 75/ 100                                           | 0/ 25/ 50/ 75/ 100                                 | 0/ 25/ 50/ 75/ 100                               | 0/ 25/ 50/ 75/ 100                                   | 1 / 2 / 3 / 4 / 5                                         |
| ___/___ D/E                               | minutes                                             | 0/ 25/ 50/ 75/ 100                                           | 0/ 25/ 50/ 75/ 100                                 | 0/ 25/ 50/ 75/ 100                               | 0/ 25/ 50/ 75/ 100                                   | 1 / 2 / 3 / 4 / 5                                         |
| ___/___ D/E                               | minutes                                             | 0/ 25/ 50/ 75/ 100                                           | 0/ 25/ 50/ 75/ 100                                 | 0/ 25/ 50/ 75/ 100                               | 0/ 25/ 50/ 75/ 100                                   | 1 / 2 / 3 / 4 / 5                                         |
| ___/___ D/E                               | minutes                                             | 0/ 25/ 50/ 75/ 100                                           | 0/ 25/ 50/ 75/ 100                                 | 0/ 25/ 50/ 75/ 100                               | 0/ 25/ 50/ 75/ 100                                   | 1 / 2 / 3 / 4 / 5                                         |

Have you listened to the mindfulness instruction audio recording this week?

Yes / No

Have you listened to the mindfulness guided practice audio recording this week?

Yes / No

**Have you practiced any other mindfulness while not offering skin-to-skin care?**

**Yes / No** (if yes please detail below)

Any comments to help this study or about your mindfulness experience:

---



---



---
