# Supplementary material for: Mindful Kangaroo Care: mindfulness intervention for mothers during skin-to-skin care: a randomized control pilot study
Source: PubMed Central journal article supplement (PMC8761274; doi:10.1186/s12884-021-04336-w), 2022-01-15
Supplement: 12884_2021_4336_MOESM8_ESM.pdf [file 12884_2021_4336_MOESM8_ESM.pdf]

**Mindful Kangaroo Care: Mindfulness Intervention for mothers during skin-to-skin care: a randomized control pilot study.**

**Additional file #8: Acceptability form, both groups**

Thanks for participating in our study.

We would like to ask **how acceptable** to you were the different interventions that we used during this research project.

| Please place an X under the appropriate column                |               |         |            |
|---------------------------------------------------------------|---------------|---------|------------|
|                                                               | Unacceptable* | Neutral | Acceptable |
| General Demographic Form (1st week)                           |               |         |            |
| Mindfulness instructions (live)<br>(if applicable)            |               |         |            |
| Mindfulness audio recordings<br>(if applicable)               |               |         |            |
| Weekly visit with one of the team member                      |               |         |            |
| Kangaroo care log (weekly)                                    |               |         |            |
| Mindfulness scale (13 questions)<br>(1st and last week)       |               |         |            |
| Parent Stress scale (45 questions)<br>(1st and last week)     |               |         |            |
| Depression and Anxiety scale (4 quest)<br>(1st and last week) |               |         |            |

\* For each unacceptable, please provide some comments to help us to improve this research study:

---



---



---



---



---



---



---



---
