# Supplementary material for: Mindful Kangaroo Care: mindfulness intervention for mothers during skin-to-skin care: a randomized control pilot study
Source: PubMed Central journal article supplement (PMC8761274; doi:10.1186/s12884-021-04336-w), 2022-01-15
Supplement: 12884_2021_4336_MOESM9_ESM.pdf [file 12884_2021_4336_MOESM9_ESM.pdf]

**Mindful Kangaroo Care: Mindfulness Intervention for mothers during skin-to-skin care: a randomized control pilot study.**

**Additional file #9: Feasibility form**

**Recruitment capability**

Date recruited (D/M/Y) : \_\_\_\_ / \_\_\_\_ / 2019

Who recruited: \_\_\_\_\_

Completed the study (4 weeks): Yes / No ; if no, how many weeks \_\_\_\_\_

Comments: \_\_\_\_\_

\_\_\_\_\_

\_\_\_\_\_

**Data collection (0= not completed, 1= partially completed, 2= fully completed)**

General Demographic Form: \_\_\_\_\_

Week 1 Kangaroo care log: \_\_\_\_\_

Week 2 Kangaroo care log: \_\_\_\_\_

Week 3 Kangaroo care log: \_\_\_\_\_

Week 4 Kangaroo care log: \_\_\_\_\_

Week 1 Mindfulness scale: \_\_\_\_\_

Week 4 Mindfulness scale: \_\_\_\_\_

Week 1 Stress scale: \_\_\_\_\_

Week 4 Stress scale: \_\_\_\_\_

Week 1 Depression and Anxiety: \_\_\_\_\_

Week 4 Depression and Anxiety: \_\_\_\_\_

Acceptability form: \_\_\_\_\_

Comments: \_\_\_\_\_

\_\_\_\_\_

\_\_\_\_\_

**Resources**

Week 1 duration of encounter (in minutes) \_\_\_\_\_ min

Week 1 easiness to meet the patient in kangaroo care (intervention) or meet patient (control)

(1= Complicated, 2= Neutral, 3= Easy)

Availability of investigator to coach: (0=None, 1 = Only One, 2= More than one)

Comments: \_\_\_\_\_

Week 2 duration of encounter (in minutes) \_\_\_\_\_ min

Week 2 easiness to meet the patient in kangaroo care (intervention) or meet patient (control)

(1= Complicated, 2= Neutral, 3= Easy)

Availability of investigator to coach: (0=None, 1 = Only One, 2= More than one)

Comments: \_\_\_\_\_

Week 3 duration of encounter (in minutes) \_\_\_\_\_ min

Week 3 easiness to meet the patient (1= Complicated, 2= Neutral, 3= Easy)

Availability of investigator to coach: (0=None, 1 = Only One, 2= More than one)

Comments: \_\_\_\_\_

Week 4 duration of encounter (in minutes) \_\_\_\_\_ min

Week 4 easiness to meet the patient (1= Complicated, 2= Neutral, 3= Easy)

Availability of investigator to coach: (0=None, 1 = Only One, 2= More than one)

Comments: \_\_\_\_\_

Issues to download or stream 1st week MP3 recording (intervention only): \_\_\_\_\_

Issues to download or stream 2nd week MP3 recording (intervention only): \_\_\_\_\_

Comments: \_\_\_\_\_

\_\_\_\_\_  
\_\_\_\_\_
